# Supplementary material for: A novel 2,6-bis(benzoxazolyl)phenol macrocyclic chemosensor with enhanced fluorophore properties by photoinduced intramolecular proton transfer
Source: Royal Society of Chemistry journal article supplement (doi:10.1039/d3dt00140g), 2023-01-01
Supplement: d3dt00140g1.pdf [file d3dt00140g1.pdf]

## Electronic Supporting Information

# A novel 2,6-bis(benzoxazolyl)phenol macrocyclic chemosensor with enhanced fluorophore properties by photoinduced intramolecular proton transfer

*Daniele Paderni,<sup>†</sup> Giampaolo Barone,<sup>‡\*</sup> Luca Giorgi,<sup>†\*</sup> Mauro Formica,<sup>†</sup> Eleonora Macedi,<sup>†</sup> and  
Vieri Fusi<sup>†</sup>*

<sup>†</sup> Dipartimento di Scienze Pure e Applicate (DiSPeA), Università di Urbino “Carlo Bo”, Piazza  
Rinascimento 6, I-61029 Urbino, Italy.

<sup>‡</sup> Dipartimento di Scienze e Tecnologie Biologiche, Chimiche e Farmaceutiche (STeBiCeF),  
Università degli Studi di Palermo, Viale delle Scienze, Edificio 17, I-90128 Palermo, Italy.

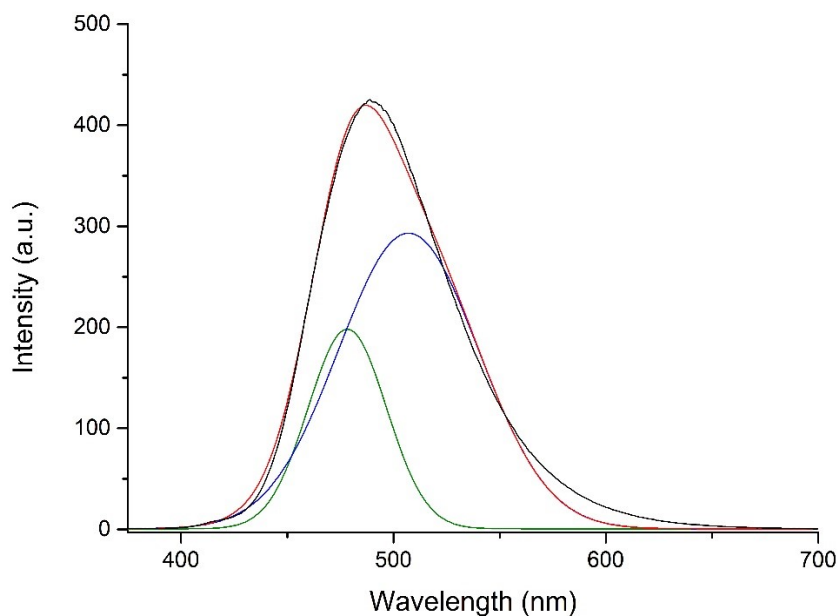

**Figure S1.** Deconvolution of the emission band at pH=9. The figure reports the experimental emission band recorded at pH=9 (black line), the deconvoluted keto (blue line) and deprotonation emission bands (green line), together with the cumulative fit of the two deconvoluted bands (red line).

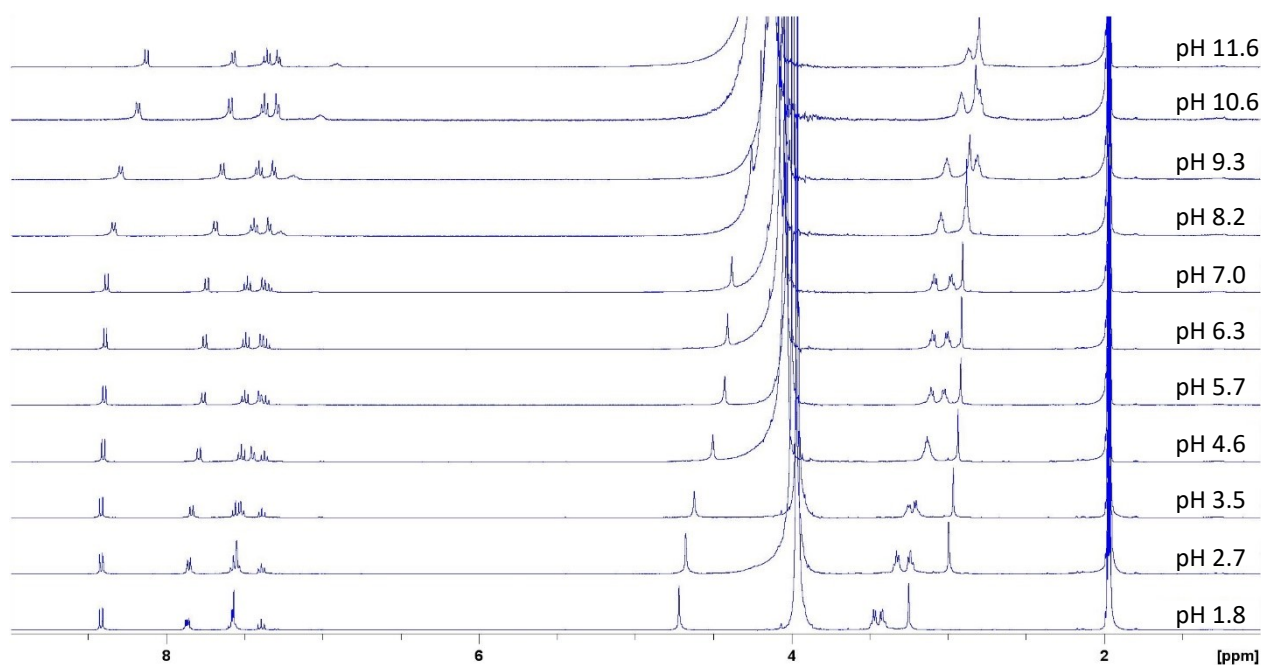

**Figure S2.**  $^1\text{H-NMR}$  spectra of **L** recorded at different pH values in  $\text{D}_2\text{O}/\text{acetonitrile-}d_6$  40/60 at 298 K.

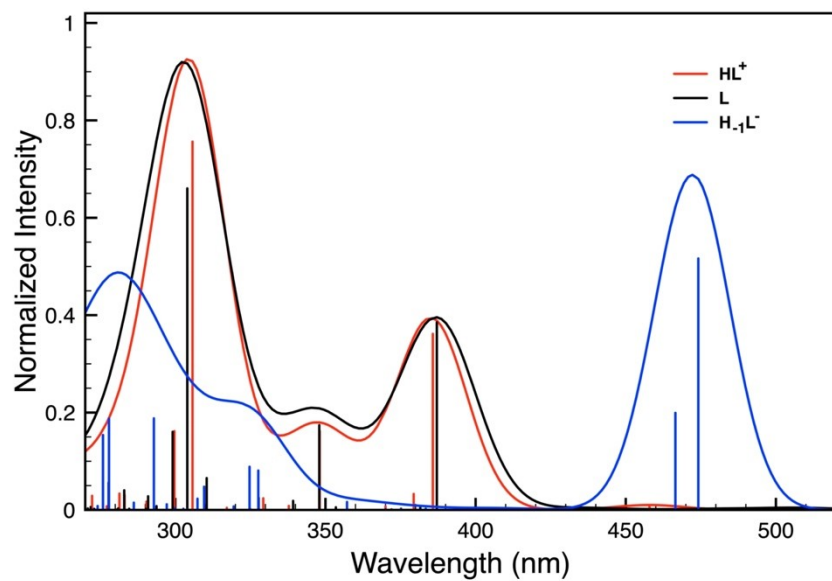

**Figure S3.** Theoretical UV-Visible absorption spectra of the most stable species of  $H_1L^-$  (blue line),  $L$  (black line) and  $HL^+$  (red line), obtained by TD-DFT calculations.

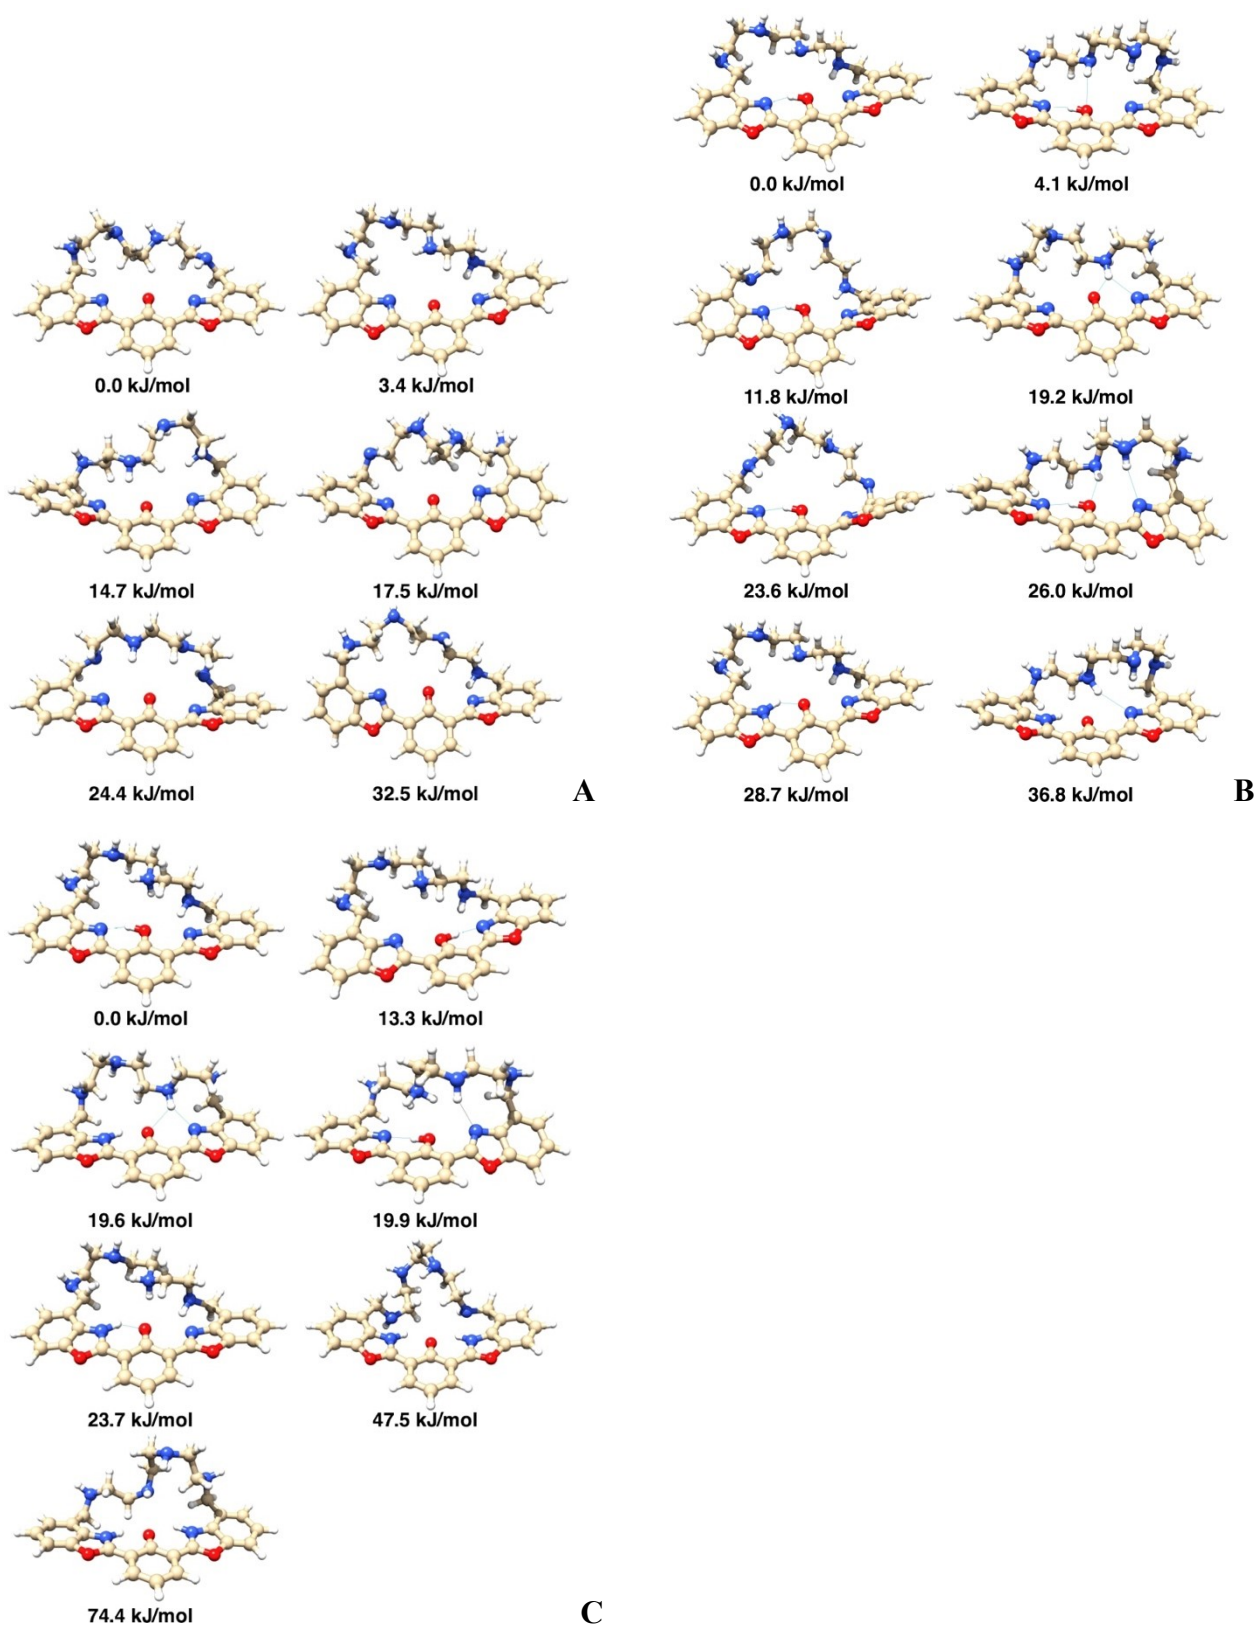

**Figure S4.** Conformers and tautomers found for species the  $H_1L^-$  (A),  $L$  (B) and  $HL^+$  (C), obtained by DFT calculations

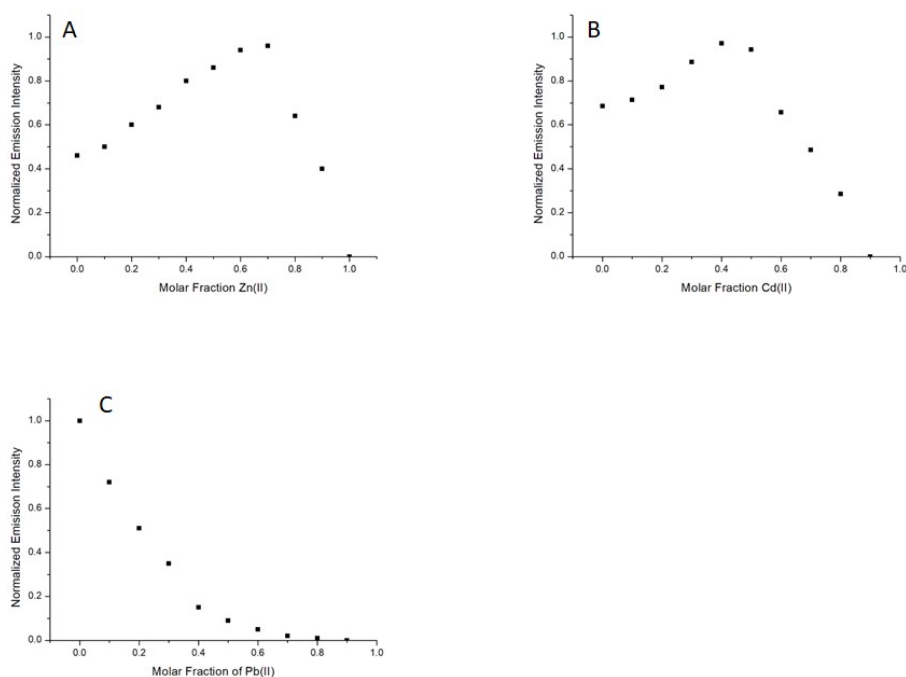

**Figure S5.** Job-Plots of **L** with Zn(II) (A, Emission at 463 nm), Cd(II) (B, Emission at 463 nm) and Pb(II) (C, Emission at 507 nm). Conditions: aqueous solution at pH = 7.0 (Tris-HCl 0.001 mol dm<sup>-3</sup>) at 298 K, [**L**] = 1.0·10<sup>-5</sup> mol dm<sup>-3</sup>.

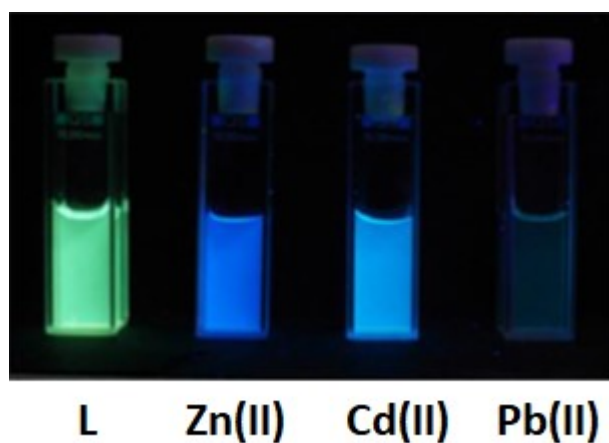

**Figure S6.** Color changes from green to blue after the addition of Zn(II) and Cd(II) and quenching of the fluorescence upon addition of Pb(II) to an aqueous solution of **L** (10<sup>-5</sup> mol dm<sup>-3</sup>, Tris-HCl 10<sup>-3</sup> mol dm<sup>-3</sup>, pH = 7.0, lighting with 360 nm UV lamp).

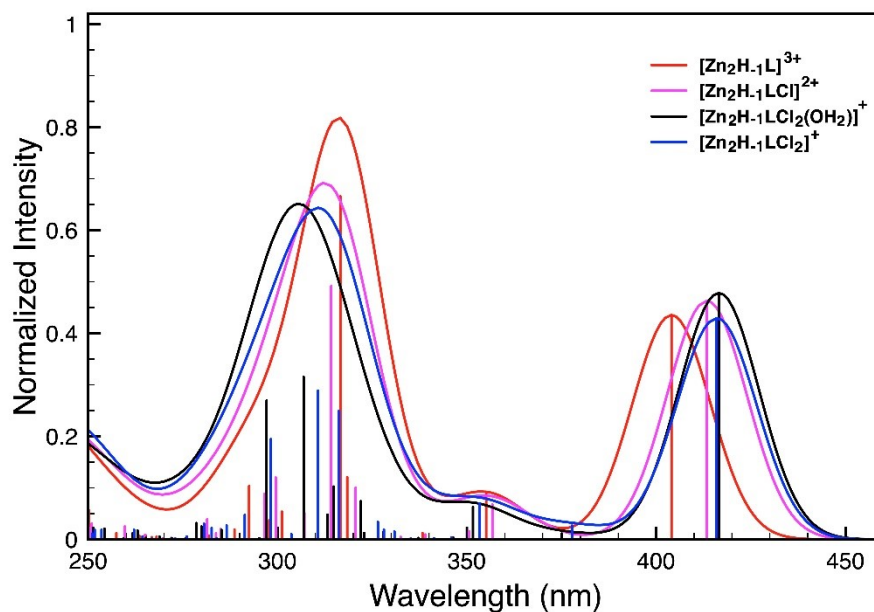

**Figure S7.** Theoretical UV-Visible absorption spectra of the most stable species of the four considered dinuclear zinc(II) complexes of **L**, including also Cl<sup>-</sup> and H<sub>2</sub>O, as indicated, obtained by TD-DFT calculations.

**Table S1.** Chemical shifts of the protons of **L** as a function of pH (ppm) in D<sub>2</sub>O/acetone-*d*<sub>6</sub> 40/60 at 298 K.

| pH   | H1   | H3   | H2   | H4   | H9   | H5   | H6   | H7   | H8   |
|------|------|------|------|------|------|------|------|------|------|
| 1.8  | 3.25 | 3.42 | 3.48 | 4.72 | 7.39 | 7.59 | 7.58 | 7.87 | 8.42 |
| 2.7  | 2.99 | 3.24 | 3.33 | 4.68 | 7.39 | 7.57 | 7.57 | 7.86 | 8.42 |
| 3.5  | 2.97 | 3.21 | 3.25 | 4.62 | 7.39 | 7.52 | 7.56 | 7.84 | 8.42 |
| 4.6  | 2.93 | 3.13 | 3.13 | 4.50 | 7.37 | 7.45 | 7.52 | 7.79 | 8.40 |
| 5.7  | 2.92 | 3.11 | 3.02 | 4.43 | 7.36 | 7.40 | 7.50 | 7.76 | 8.40 |
| 6.3  | 2.92 | 3.10 | 3.00 | 4.41 | 7.36 | 7.39 | 7.49 | 7.75 | 8.39 |
| 7.0  | 2.90 | 3.10 | 2.98 | 4.38 | 7.35 | 7.38 | 7.48 | 7.74 | 8.38 |
| 8.2  | 2.88 | 3.05 | 2.88 | 4.26 | 7.26 | 7.34 | 7.44 | 7.69 | 8.34 |
| 9.3  | 2.86 | 3.01 | 2.81 | 4.16 | 7.19 | 7.31 | 7.41 | 7.64 | 8.29 |
| 10.6 | 2.82 | 2.91 | 2.79 | -    | 7.02 | 7.29 | 7.37 | 7.59 | 8.18 |
| 11.6 | 2.80 | 2.87 | 2.79 | 4.08 | 6.91 | 7.28 | 7.36 | 7.57 | 8.13 |

## NMR spectra of synthetic intermediates and of the final product

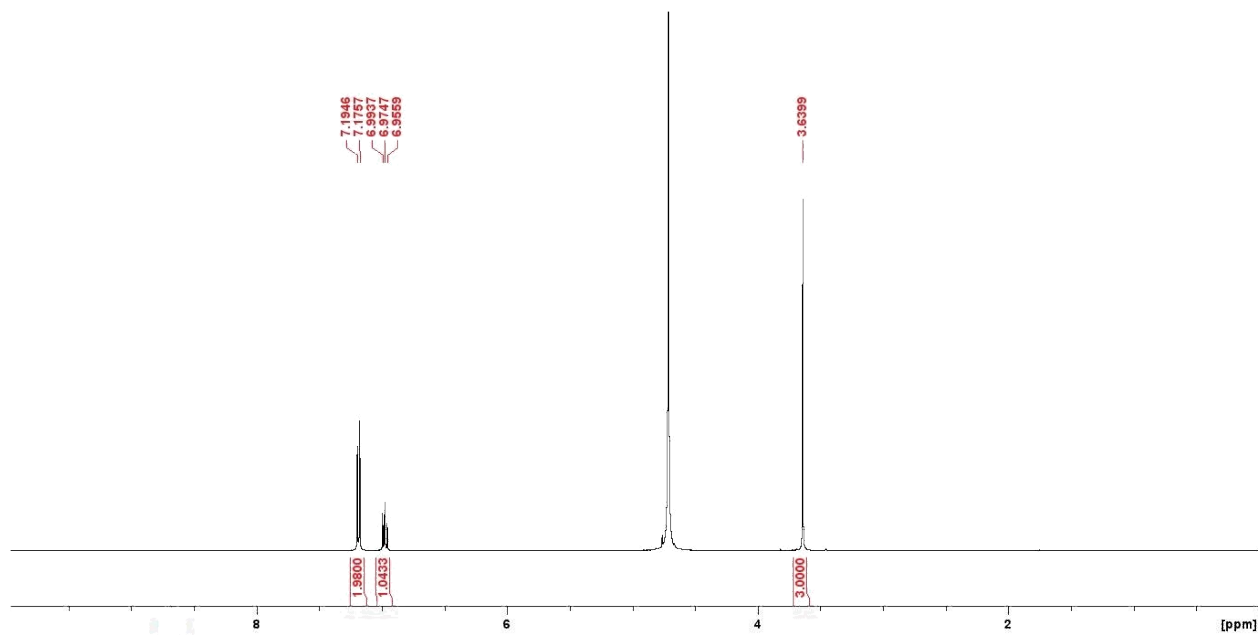

Figure S8. <sup>1</sup>H-NMR of 2-Methoxyisophthalic acid (**2**), D<sub>2</sub>O, 400 MHz.

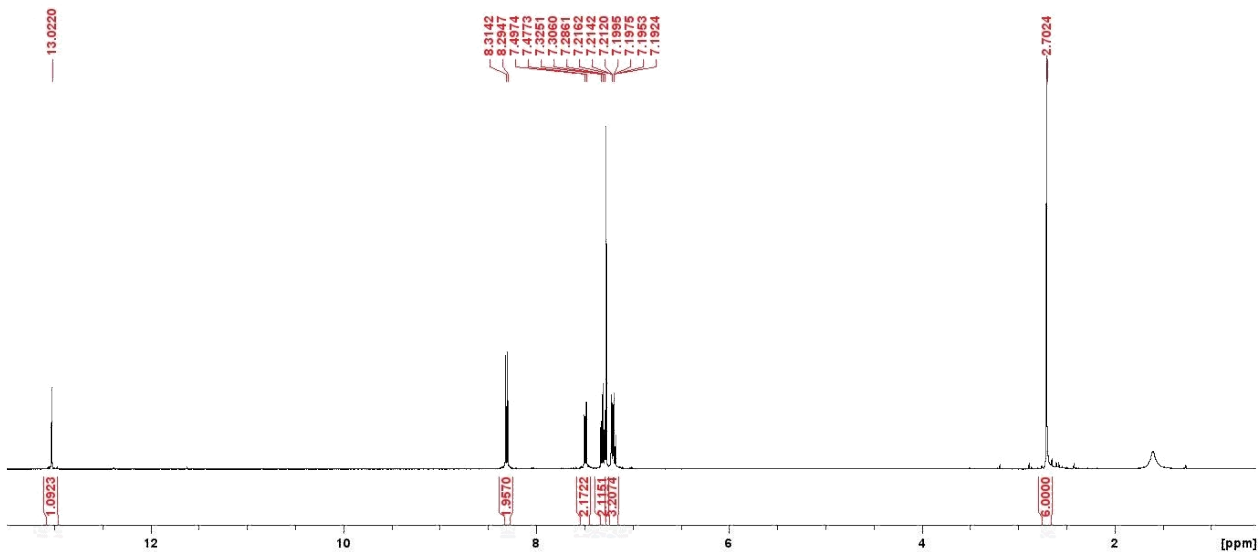

Figure S9. <sup>1</sup>H-NMR of 2,6-bis(4-methyl-2-oxazolyl)phenol (**4**), CDCl<sub>3</sub>, 400 MHz.

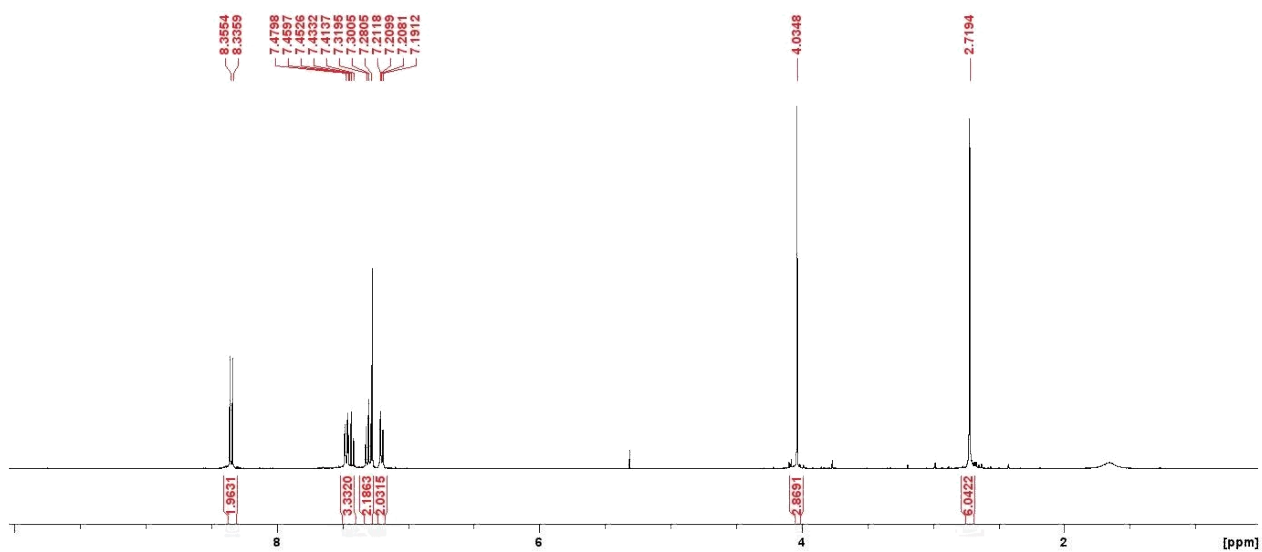

Figure S10. <sup>1</sup>H-NMR of 2,6-bis(4-methyl-2-oxazolyl)anisole (**5**), CDCl<sub>3</sub>, 400 MHz.

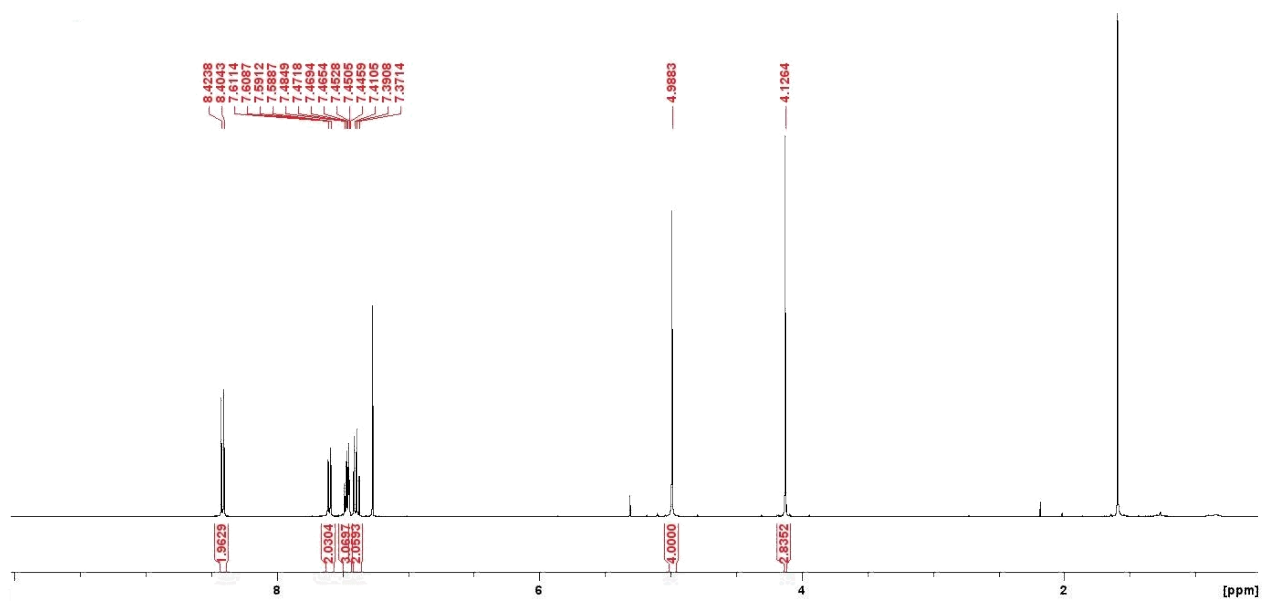

Figure S11. <sup>1</sup>H-NMR of 2,6-bis(4-bromomethyl-2-oxazolyl)anisole (**6**), CDCl<sub>3</sub>, 400 MHz.



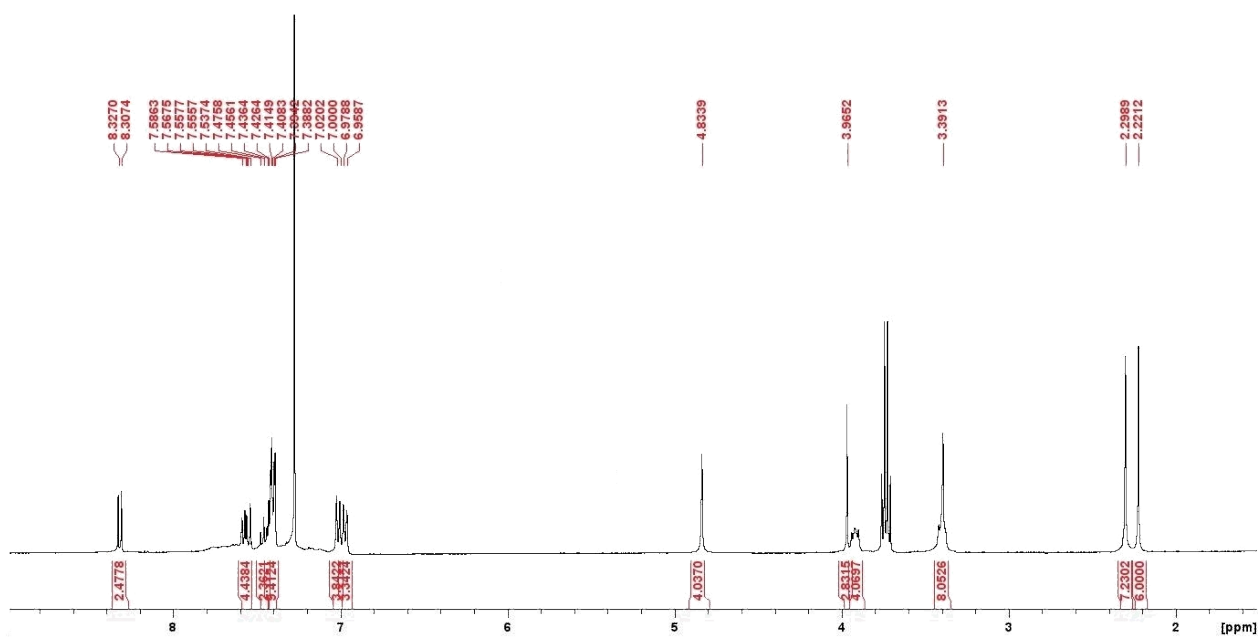

**Figure S12.**  $^1\text{H-NMR}$  of 34-methoxy-11,14,17,20-tetratosylhexacyclo[28.3.1.1(2,5).1(26,29).0(9,4).0(22,27)]-35,36-dioxa-3,11,14,17,20,28-hexaaza-2,4,6,8,22,24,26,28,30,32,1(34)-tetratricontaendecaene (**8**),  $\text{CDCl}_3$ , 400 MHz.

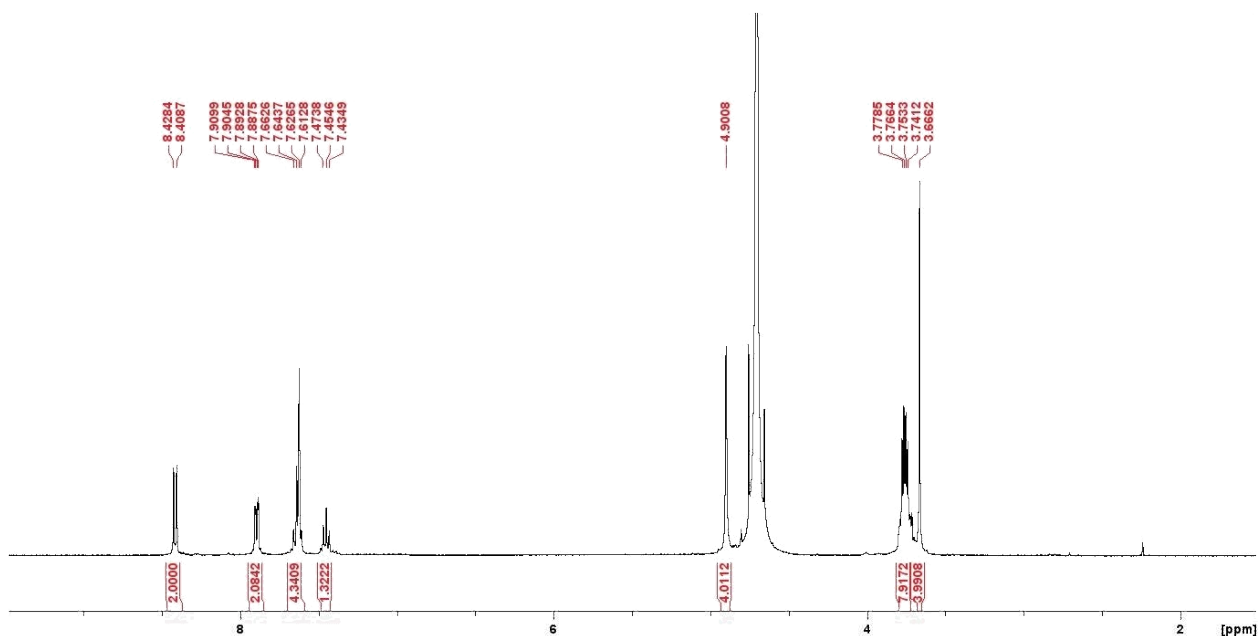

**Figure S13.**  $^1\text{H-NMR}$  of hexacyclo[28.3.1.1(2,5).1(26,29).0(9,4).0(22,27)]-35,36-dioxa-3,11,14,17,20,28-hexaaza-2,4,6,8,22,24,26,28,30,32,1(34)-tetratricontaendecaen-34-ol tetraperchlorate (**L·4HClO<sub>4</sub>**),  $\text{D}_2\text{O}$ , 400 MHz.

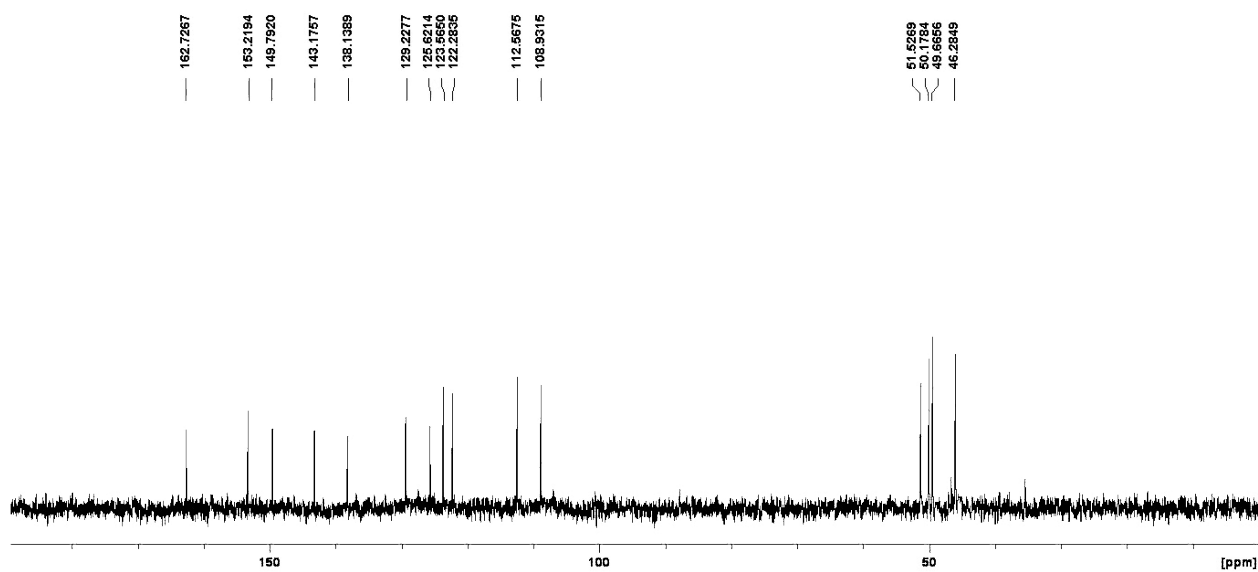

**Figure S14.**  $^{13}\text{C}$ -NMR of hexacyclo[28.3.1.1(2,5).1(26,29).0(9,4).0(22,27)]-35,36-dioxo-3,11,14,17,20,28-hexaaza-2,4,6,8,22,24,26,28,30,32,1(34)-tetratricontaen-34-ol tetraperchlorate ( $\text{L}\cdot 4\text{HClO}_4$ )  $\text{D}_2\text{O}$ , 100 MHz.
